# Supplementary material
Source: MDPI journal article supplement (https://www.mdpi.com/2071-1050/13/11/6090)
Supplement: s1 [file s1]

[illegible]

|      |                                                                                                                                                                                 |               |     |       |
|------|---------------------------------------------------------------------------------------------------------------------------------------------------------------------------------|---------------|-----|-------|
| 2.5  | Prioritize customer demand e.g. by segmentation                                                                                                                                 | DE2, DE4, EY1 | x   | x     |
| 2.6  | Communicate and stay engaged with customers                                                                                                                                     | DE1, DE2, DE4 | x   | x     |
| 2.7  | Consider how sales effort and innovative offerings will appear to public and create a positive social and environmental impact                                                  | DE4, EY1      | x x | x     |
| 2.8  | Confirm short term demand-supply synchronization strategy                                                                                                                       | DE4           | x   | x x x |
| 2.9  | Include reduced demand or changing product portfolio into the sales and operations planning                                                                                     | DE1           | x   | x     |
| 2.10 | Revisit pricing and customer contracts                                                                                                                                          | DE2           | x   | x x x |
| 3    | Anticipate moment of rebound                                                                                                                                                    |               |     |       |
| 3.1  | Plan for safe and volatile restart/ ramp-up of operations, support first mover and develop pricing strategy                                                                     | DE1, DE2, EY1 | x   | x x x |
| 3.2  | Plan operational priorities after restart                                                                                                                                       | DE2, DE3      | x   | x     |
| 3.3  | Scan market signals and seek indicators to time rebound                                                                                                                         | DE2           | x   | x     |
| 3.4  | Dampen the bullwhip effect                                                                                                                                                      | DE2           | x   | x x   |
| 3.5  | Adapt to inventory imbalances across the network                                                                                                                                | DE2           | x   | x x   |
| 3.6  | Reforecast demand                                                                                                                                                               | DE2           | x   | x     |
| 4    | Create awareness on different scenarios and risks                                                                                                                               |               |     |       |
| 4.1  | Determine if a systems approach is necessary, apply system thinking to consider dynamic, nonlinear effects, fluctuations, instabilities                                         | BC2           | x x | x     |
| 4.2  | Observe the systems behaviors to identify the ones that need to be reshaped                                                                                                     | BC2           | x x | x     |
| 4.3  | Create a system model of your business, especially consider digital-physical interfaces while modeling, re-create symptomatic behaviors and create new more desirable behaviors | BC2           | x x | x     |
| 4.4  | Use an adaptive approach comprising experimentation, selection, and amplification of successful outcomes                                                                        | BC2, BC3, DE2 | x x | x     |

|      |                                                                                                                             |                         |     |       |
|------|-----------------------------------------------------------------------------------------------------------------------------|-------------------------|-----|-------|
| 4.5  | Model scenarios and use worst-case scenarios to stress test your business model with a focus on profitability and liquidity | MC1, DE1, DE4           | x   | x     |
| 4.6  | Conduct global scenario planning and the hierarchy of levers and actions for different scenarios                            | MC2, DE1, DE2, DE4, EY1 | x   | x     |
| 4.7  | Identify possible risks in the supply chain                                                                                 | DE2, DE4, EY1           | x   | x     |
| 4.8  | Assess risks, if possible data based, and formulate response strategies                                                     | DE2, DE4, EY1           | x x | x     |
| 4.9  | Assess customer and supplier financial health to identify risks                                                             | DE2                     | x   | x x   |
| 4.10 | Enhance focus on workforce/labor planning                                                                                   | DE4                     | x   | x     |
| 4.11 | Prepare for plant closures                                                                                                  | DE4                     | x   | x x   |
| 4.12 | Measure and manage dynamic factors / indicators within the system                                                           | BC2                     | x x | x     |
| 5    | Design a flexible system                                                                                                    |                         |     |       |
| 5.1  | Apply functional redundancy and diversify contracts, platforms etc.                                                         | BC3, MC1, DE3           | x   | x x x |
| 5.2  | Balance just-in time and just in-case production to ensure sufficient backup inventory of key parts and safety stock        | MC2                     | x   | x x   |
| 5.3  | Evaluate and prepare alternative logistics options                                                                          | MC2, DE1, DE2, DE3, DE4 | x x | x     |
| 5.4  | Confirm customer and product priorities, create strategy of inventory allocation                                            | DE1                     | x   | x x x |
| 5.5  | Define production substitution logic and rules                                                                              | DE2                     | x   | x     |
| 5.6  | Implement dynamic sales and operations planning                                                                             | DE2                     | x   | x x   |
| 5.7  | Anticipate and prepare for mismatched regional availability and demand for logistics assets                                 | DE2                     | x   | x x x |
| 5.8  | Reduce number of choke point in the supply chain through plan for temporary or alternate supply                             | DE3, DE4                | x   | x x x |

|      |                                                                                                                                                       |          |   |   |   |   |
|------|-------------------------------------------------------------------------------------------------------------------------------------------------------|----------|---|---|---|---|
| 5.9  | Review the tax, customs, duties considerations of the new supply chain flows                                                                          | DE2      | x | x | x | x |
| 5.10 | Plan alternate supply chains based on geographic and business resilience considerations                                                               | DE3      | x | x | x |   |
| 6    | Empower people and create culture                                                                                                                     |          |   |   |   |   |
| 6.1  | Empower employees to work and collaborate effectively in any circumstances, adapt with new approaches to talent management and capability development | BC1, EY1 | x |   | x |   |
| 6.2  | Keep investments in mission-critical talent especially for digitization                                                                               | MC1      | x | x | x | x |
| 6.3  | Rethink skills and working models and cross train staff                                                                                               | BC1, DE2 | x | x | x |   |
| 6.4  | Cultivate engaged employees through a sense of purpose                                                                                                | DE4      | x |   | x |   |
| 6.5  | Empathize with employees (continue hourly pay, emending leave policies etc.)                                                                          | DE4      | x |   | x |   |
| 7    | Enable agile actions                                                                                                                                  |          |   |   |   |   |
| 7.1  | Ramp up and automate operations, balancing speed, cost, quality, and safety                                                                           | BC1      |   | x | x | x |
| 7.2  | React quickly to manage disruptions in supply chain logistics, manufacturing, development, and corporate functions                                    | BC1      | x |   | x | x |
| 7.3  | Create contingency plans for responding to disruptions in case of simple change                                                                       | BC3      | x |   | x | x |
| 7.4  | Enable faster decision making by an information center                                                                                                | MC1      | x | x | x |   |
| 7.5  | Plan how to initiate closures and how to reroute production                                                                                           | DE1      | x |   | x | x |
| 7.6  | Enable production scheduling agility to quickly change production schedules based on real-time developments                                           | DE1, DE4 | x |   | x |   |
| 7.7  | Update inventory policy and planning parameters                                                                                                       | DE1, DE4 | x |   | x | x |
| 7.8  | Prepare for increased absenteeism due to flexible sick leave and local policies                                                                       | DE4, DE1 | x |   | x |   |
| 8    | Ensure employees' safety (in case of a health crisis)                                                                                                 |          |   |   |   |   |

|     |                                                                                                                                                       |               |   |   |   |
|-----|-------------------------------------------------------------------------------------------------------------------------------------------------------|---------------|---|---|---|
| 8.1 | Educate people on symptoms and prevention                                                                                                             | DE1, DE4      | x | x |   |
| 8.2 | Review health records and arrange alternative work arrangements where necessary                                                                       | DE1           | x | x | x |
| 8.3 | Reinforce screening protocols and allow flexible sick leave                                                                                           | DE1, DE4      | x | x |   |
| 8.4 | Restrict non-essential travel                                                                                                                         | DE1, DE4      | x | x |   |
| 8.5 | Promote flexible working arrangements                                                                                                                 | DE1           | x | x | x |
| 8.6 | Support employee mental health and wellness esp. when using remote work, by open transparent considering leadership and a long-term change of culture | DE2, DE4      | x | x |   |
| 8.7 | Decide on return plan for employees and how to ensure worker safety and well-being                                                                    | DE3           | x | x |   |
| 8.8 | Enhance health capabilities e.g. testing, certification, tracking, tracing, data storage etc.                                                         | DE4, EY1      | x | x |   |
| 9   | Ensure liquidity                                                                                                                                      |               |   |   |   |
| 9.1 | Deploy an asset-light business model                                                                                                                  | BC1           | x | x |   |
| 9.2 | Continuously adjust the cost structure to demand and optimize the asset portfolio and net working capital                                             | BC1           | x | x | x |
| 9.3 | Identify levers for financial performance, e.g. discretionary expense reduction, hiring freeze etc. and consider cash flow                            | BC1, DE2, DE4 | x | x | x |
| 9.4 | Operate an expenses-driven cost model                                                                                                                 | BC1           | x | x |   |
| 9.5 | Apply digital and analytics tools to manage cash and working capital                                                                                  | BC1, MC1      | x | x | x |
| 9.6 | Rationalize portfolio e.g. by divesting underperforming businesses early                                                                              | MC1           | x | x | x |
| 9.7 | Focus on operational effectiveness to maintain and expand cost lead                                                                                   | MC1           | x | x | x |

|      |                                                                                                                                  |          |   |   |   |   |     |
|------|----------------------------------------------------------------------------------------------------------------------------------|----------|---|---|---|---|-----|
| 9.8  | Develop a treasury plan, collection and reduction of aged accounts receivable, extend payables                                   | DE1      | x |   | x |   | x   |
| 9.9  | Develop a cash strategy for recovery                                                                                             | DE2      |   | x | x | x | x   |
| 9.10 | Reduce drivers for external spending, renegotiate prices and contract terms while working thoughtfully with struggling suppliers | DE2, EY1 | x | x | x | x |     |
| 9.11 | Align key lending and investor stakeholders on terms, timing and capital availability                                            | DE3      | x | x | x | x |     |
| 9.12 | Reorientate stakeholders around cash generation vs. profit generation                                                            | DE3      | x | x | x |   | x   |
| 9.13 | Catalogue sources of cash available to the company e.g. unused credit lines, government aid programs                             | DE3, DE4 | x | x | x | x | x   |
| 9.14 | Define non-negotiables (products, services, customer segments, business lines, employee segments etc.)                           | DE4      | x |   | x |   |     |
| 9.15 | Simplify products and optimize asset utilization                                                                                 | EY1      | x |   | x | x | x   |
| 10   | Identify revenue opportunities                                                                                                   |          |   |   |   |   |     |
| 10.1 | Acquire new post-crises business and conduct investments in growth and rarely impacted sectors early                             | MC1      | x | x |   | x | x x |
| 10.2 | Review and recreate value proposition (e.g. create new features and services)                                                    | MC1, DE3 |   | x |   | x |     |
| 10.3 | Find opportunities for new cross-industry collaboration                                                                          | DE3      |   | x | x |   |     |
| 10.4 | Anticipate new emerging business model                                                                                           | DE4, EY1 |   | x |   | x |     |
| 10.5 | Generate new customer leads despite general consolidation                                                                        | EY1      | x |   |   |   | x   |
| 10.6 | Adjust marketing and communications with customers                                                                               | EY1      | x |   |   | x | x   |
| 11   | Increase robustness                                                                                                              |          |   |   |   |   |     |
| 11.1 | Apply redundancies to provide a buffer against the unexpected                                                                    | BC3, MC2 | x | x | x | x | x   |
| 11.2 | Apply separate modules (subsidiaries, plants) as circuit breakers to help prevent the collapse of a system                       | BC3      | x | x |   | x | x   |
| 11.3 | Diversify suppliers and sourcing (also geographically)                                                                           | MC2      | x |   | x |   |     |

|      |                                                                                                    |     |   |  |  |  |  |  |  |  |  |  |  |  |  |  |  |  |  |  |  |  |  |  |  |  |  |  |  |  |  |  |  |  |  |  |  |  |  |  |  |  |  |  |  |  |  |  |  |  |  |  |  |  |  |  |  |  |  |  |  |  |  |  |  |  |  |  |  |  |  |  |  |  |  |  |  |  |  |  |  |  |  |  |  |  |  |  |  |  |  |  |  |  |  |  |  |  |  |  |  |  |  |  |  |  |  |  |  |  |  |  |  |  |  |  |  |  |  |  |  |  |  |  |  |  |  |  |  |  |  |  |  |  |  |  |  |  |  |  |  |  |  |  |  |  |  |  |  |  |  |  |  |  |  |  |  |  |  |  |  |  |  |  |  |  |  |  |  |  |  |  |  |  |  |  |  |  |  |  |  |  |  |  |  |  |  |  |  |  |  |  |  |  |  |  |  |  |  |  |  |  |  |  |  |  |  |  |  |  |  |  |  |  |  |  |  |  |  |  |  |  |  |  |  |  |  |  |  |  |  |  |  |  |  |  |  |  |  |  |  |  |  |  |  |  |  |  |  |  |  |  |  |  |  |  |  |  |  |  |  |  |  |  |  |  |  |  |  |  |  |  |  |  |  |  |  |  |  |  |  |  |  |  |  |  |  |  |  |  |  |  |  |  |  |  |  |  |  |  |  |  |  |  |  |  |  |  |  |  |  |  |  |  |  |  |  |  |  |  |  |  |  |  |  |  |  |  |  |  |  |  |  |  |  |  |  |  |  |  |  |  |  |  |  |  |  |  |  |  |  |  |  |  |  |  |  |  |  |  |  |  |  |  |  |  |  |  |  |  |  |  |  |  |  |  |  |  |  |  |  |  |  |  |  |  |  |  |  |  |  |  |  |  |  |  |  |  |  |  |  |  |  |  |  |  |  |  |  |  |  |  |  |  |  |  |  |  |  |  |  |  |  |  |  |  |  |  |  |  |  |  |  |  |  |  |  |  |  |  |  |  |  |  |  |  |  |  |  |  |  |  |  |  |  |  |  |  |  |  |  |  |  |  |  |  |  |  |  |  |  |  |  |  |  |  |  |  |  |  |  |  |  |  |  |  |  |  |  |  |  |  |  |  |  |  |  |  |  |  |  |  |  |  |  |  |  |  |  |  |  |  |  |  |  |  |  |  |  |  |  |  |  |  |  |  |  |  |  |  |  |  |  |  |  |  |  |  |  |  |  |  |  |  |  |  |  |  |  |  |  |  |  |  |  |  |  |  |  |  |  |  |  |  |  |  |  |  |  |  |  |  |  |  |  |  |  |  |  |  |  |  |  |  |  |  |  |  |  |  |  |  |  |  |  |  |  |  |  |  |  |  |  |  |  |  |  |  |  |  |  |  |  |  |  |  |  |  |  |  |  |  |  |  |  |  |  |  |  |  |  |  |  |  |  |  |  |  |  |  |  |  |  |  |  |  |  |  |  |  |  |  |  |  |  |  |  |  |  |  |  |  |  |  |  |  |  |  |  |  |  |  |  |  |  |  |  |  |  |  |  |  |  |  |  |  |  |  |  |  |  |  |  |  |  |  |  |  |  |  |  |  |  |  |  |  |  |  |  |  |  |  |  |  |  |  |  |  |  |  |  |  |  |  |  |  |  |  |  |  |  |  |  |  |  |  |  |  |  |  |  |  |  |  |  |  |  |  |  |  |  |  |  |  |  |  |  |  |  |  |  |  |  |  |  |  |  |  |  |  |  |  |  |  |  |  |  |  |  |  |  |  |  |  |  |  |  |  |  |  |  |  |  |  |  |  |  |  |  |  |  |  |  |  |  |  |  |  |  |  |  |  |  |  |  |  |  |  |  |  |  |  |  |  |  |  |  |  |  |  |  |  |  |  |  |  |  |  |  |  |  |  |  |  |  |  |  |  |  |  |  |  |  |  |  |  |  |  |  |  |  |  |  |  |  |  |  |  |  |  |  |  |  |  |  |  |  |  |  |  |  |  |  |  |  |  |  |  |  |  |  |  |  |  |  |  |  |  |  |  |  |  |  |  |  |  |  |  |  |  |  |  |  |  |  |  |  |  |  |  |  |  |  |  |  |  |  |  |  |  |  |  |  |  |  |  |  |  |  |  |  |  |  |  |  |  |  |  |  |  |  |  |  |  |  |  |  |  |  |  |  |  |  |  |  |  |  |  |  |  |  |  |  |  |  |  |  |  |  |  |  |  |  |  |  |  |  |  |  |  |  |  |  |  |  |  |  |  |  |  |  |  |  |  |  |  |  |  |  |  |  |  |  |  |  |  |  |  |  |  |  |  |  |  |  |  |  |  |  |  |  |  |  |  |  |  |  |  |  |  |  |  |  |  |  |  |  |  |  |  |  |  |  |  |  |  |  |  |  |  |  |  |  |  |  |  |  |  |  |  |  |  |  |  |  |  |  |  |  |  |  |  |  |  |  |  |  |  |  |  |  |  |  |  |  |  |  |  |  |  |  |  |  |  |  |  |  |  |  |  |  |  |  |  |  |  |  |  |  |  |  |  |  |  |  |  |  |  |  |  |  |  |  |  |  |  |  |  |  |  |  |  |  |  |  |  |  |  |  |  |  |  |  |  |  |  |  |  |  |  |  |  |  |  |  |  |  |  |  |  |  |  |  |  |  |  |  |  |  |  |  |  |  |  |  |  |  |  |  |  |  |  |  |  |  |  |  |  |  |  |  |  |  |  |  |  |  |  |  |  |  |  |  |  |  |  |  |  |  |  |  |  |  |  |  |  |  |  |  |  |  |  |  |  |  |  |  |  |  |  |  |  |  |  |  |  |  |  |  |  |  |  |  |  |  |  |  |  |  |  |  |  |  |  |  |  |  |  |  |  |  |  |  |  |  |  |  |  |  |  |  |  |  |  |  |  |  |  |  |  |  |  |  |  |  |  |  |  |  |  |  |  |  |  |  |  |  |  |  |  |  |  |  |  |  |  |  |  |  |  |  |  |  |  |  |  |  |  |  |  |  |  |  |  |  |  |  |  |  |  |  |  |  |  |  |  |  |  |  |  |  |  |  |
|------|----------------------------------------------------------------------------------------------------|-----|---|--|--|--|--|--|--|--|--|--|--|--|--|--|--|--|--|--|--|--|--|--|--|--|--|--|--|--|--|--|--|--|--|--|--|--|--|--|--|--|--|--|--|--|--|--|--|--|--|--|--|--|--|--|--|--|--|--|--|--|--|--|--|--|--|--|--|--|--|--|--|--|--|--|--|--|--|--|--|--|--|--|--|--|--|--|--|--|--|--|--|--|--|--|--|--|--|--|--|--|--|--|--|--|--|--|--|--|--|--|--|--|--|--|--|--|--|--|--|--|--|--|--|--|--|--|--|--|--|--|--|--|--|--|--|--|--|--|--|--|--|--|--|--|--|--|--|--|--|--|--|--|--|--|--|--|--|--|--|--|--|--|--|--|--|--|--|--|--|--|--|--|--|--|--|--|--|--|--|--|--|--|--|--|--|--|--|--|--|--|--|--|--|--|--|--|--|--|--|--|--|--|--|--|--|--|--|--|--|--|--|--|--|--|--|--|--|--|--|--|--|--|--|--|--|--|--|--|--|--|--|--|--|--|--|--|--|--|--|--|--|--|--|--|--|--|--|--|--|--|--|--|--|--|--|--|--|--|--|--|--|--|--|--|--|--|--|--|--|--|--|--|--|--|--|--|--|--|--|--|--|--|--|--|--|--|--|--|--|--|--|--|--|--|--|--|--|--|--|--|--|--|--|--|--|--|--|--|--|--|--|--|--|--|--|--|--|--|--|--|--|--|--|--|--|--|--|--|--|--|--|--|--|--|--|--|--|--|--|--|--|--|--|--|--|--|--|--|--|--|--|--|--|--|--|--|--|--|--|--|--|--|--|--|--|--|--|--|--|--|--|--|--|--|--|--|--|--|--|--|--|--|--|--|--|--|--|--|--|--|--|--|--|--|--|--|--|--|--|--|--|--|--|--|--|--|--|--|--|--|--|--|--|--|--|--|--|--|--|--|--|--|--|--|--|--|--|--|--|--|--|--|--|--|--|--|--|--|--|--|--|--|--|--|--|--|--|--|--|--|--|--|--|--|--|--|--|--|--|--|--|--|--|--|--|--|--|--|--|--|--|--|--|--|--|--|--|--|--|--|--|--|--|--|--|--|--|--|--|--|--|--|--|--|--|--|--|--|--|--|--|--|--|--|--|--|--|--|--|--|--|--|--|--|--|--|--|--|--|--|--|--|--|--|--|--|--|--|--|--|--|--|--|--|--|--|--|--|--|--|--|--|--|--|--|--|--|--|--|--|--|--|--|--|--|--|--|--|--|--|--|--|--|--|--|--|--|--|--|--|--|--|--|--|--|--|--|--|--|--|--|--|--|--|--|--|--|--|--|--|--|--|--|--|--|--|--|--|--|--|--|--|--|--|--|--|--|--|--|--|--|--|--|--|--|--|--|--|--|--|--|--|--|--|--|--|--|--|--|--|--|--|--|--|--|--|--|--|--|--|--|--|--|--|--|--|--|--|--|--|--|--|--|--|--|--|--|--|--|--|--|--|--|--|--|--|--|--|--|--|--|--|--|--|--|--|--|--|--|--|--|--|--|--|--|--|--|--|--|--|--|--|--|--|--|--|--|--|--|--|--|--|--|--|--|--|--|--|--|--|--|--|--|--|--|--|--|--|--|--|--|--|--|--|--|--|--|--|--|--|--|--|--|--|--|--|--|--|--|--|--|--|--|--|--|--|--|--|--|--|--|--|--|--|--|--|--|--|--|--|--|--|--|--|--|--|--|--|--|--|--|--|--|--|--|--|--|--|--|--|--|--|--|--|--|--|--|--|--|--|--|--|--|--|--|--|--|--|--|--|--|--|--|--|--|--|--|--|--|--|--|--|--|--|--|--|--|--|--|--|--|--|--|--|--|--|--|--|--|--|--|--|--|--|--|--|--|--|--|--|--|--|--|--|--|--|--|--|--|--|--|--|--|--|--|--|--|--|--|--|--|--|--|--|--|--|--|--|--|--|--|--|--|--|--|--|--|--|--|--|--|--|--|--|--|--|--|--|--|--|--|--|--|--|--|--|--|--|--|--|--|--|--|--|--|--|--|--|--|--|--|--|--|--|--|--|--|--|--|--|--|--|--|--|--|--|--|--|--|--|--|--|--|--|--|--|--|--|--|--|--|--|--|--|--|--|--|--|--|--|--|--|--|--|--|--|--|--|--|--|--|--|--|--|--|--|--|--|--|--|--|--|--|--|--|--|--|--|--|--|--|--|--|--|--|--|--|--|--|--|--|--|--|--|--|--|--|--|--|--|--|--|--|--|--|--|--|--|--|--|--|--|--|--|--|--|--|--|--|--|--|--|--|--|--|--|--|--|--|--|--|--|--|--|--|--|--|--|--|--|--|--|--|--|--|--|--|--|--|--|--|--|--|--|--|--|--|--|--|--|--|--|--|--|--|--|--|--|--|--|--|--|--|--|--|--|--|--|--|--|--|--|--|--|--|--|--|--|--|--|--|--|--|--|--|--|--|--|--|--|--|--|--|--|--|--|--|--|--|--|--|--|--|--|--|--|--|--|--|--|--|--|--|--|--|--|--|--|--|--|--|--|--|--|--|--|--|--|--|--|--|--|--|--|--|--|--|--|--|--|--|--|--|--|--|--|--|--|--|--|--|--|--|--|--|--|--|--|--|--|--|--|--|--|--|--|--|--|--|--|--|--|--|--|--|--|--|--|--|--|--|--|--|--|--|--|--|--|--|--|--|--|--|--|--|--|--|--|--|--|--|--|--|--|--|--|--|--|--|--|--|--|--|--|--|--|--|--|--|--|--|--|--|--|--|--|--|--|--|--|--|--|--|--|--|--|--|--|--|--|--|--|--|--|--|--|--|--|--|--|--|--|--|--|--|--|--|--|--|--|--|--|--|--|--|--|--|--|--|--|--|--|--|--|--|--|--|--|--|--|--|--|--|--|--|--|--|--|--|--|--|--|--|--|--|--|--|--|--|--|--|--|--|--|--|--|--|--|--|--|--|--|--|--|--|--|--|--|--|--|--|--|--|--|--|--|--|--|--|--|--|--|--|--|--|--|--|--|--|--|--|
| 11.4 | Design products with common components (e.g. on modular platforms to reduce production complexity) | MC2 | x |  |  |  |  |  |  |  |  |  |  |  |  |  |  |  |  |  |  |  |  |  |  |  |  |  |  |  |  |  |  |  |  |  |  |  |  |  |  |  |  |  |  |  |  |  |  |  |  |  |  |  |  |  |  |  |  |  |  |  |  |  |  |  |  |  |  |  |  |  |  |  |  |  |  |  |  |  |  |  |  |  |  |  |  |  |  |  |  |  |  |  |  |  |  |  |  |  |  |  |  |  |  |  |  |  |  |  |  |  |  |  |  |  |  |  |  |  |  |  |  |  |  |  |  |  |  |  |  |  |  |  |  |  |  |  |  |  |  |  |  |  |  |  |  |  |  |  |  |  |  |  |  |  |  |  |  |  |  |  |  |  |  |  |  |  |  |  |  |  |  |  |  |  |  |  |  |  |  |  |  |  |  |  |  |  |  |  |  |  |  |  |  |  |  |  |  |  |  |  |  |  |  |  |  |  |  |  |  |  |  |  |  |  |  |  |  |  |  |  |  |  |  |  |  |  |  |  |  |  |  |  |  |  |  |  |  |  |  |  |  |  |  |  |  |  |  |  |  |  |  |  |  |  |  |  |  |  |  |  |  |  |  |  |  |  |  |  |  |  |  |  |  |  |  |  |  |  |  |  |  |  |  |  |  |  |  |  |  |  |  |  |  |  |  |  |  |  |  |  |  |  |  |  |  |  |  |  |  |  |  |  |  |  |  |  |  |  |  |  |  |  |  |  |  |  |  |  |  |  |  |  |  |  |  |  |  |  |  |  |  |  |  |  |  |  |  |  |  |  |  |  |  |  |  |  |  |  |  |  |  |  |  |  |  |  |  |  |  |  |  |  |  |  |  |  |  |  |  |  |  |  |  |  |  |  |  |  |  |  |  |  |  |  |  |  |  |  |  |  |  |  |  |  |  |  |  |  |  |  |  |  |  |  |  |  |  |  |  |  |  |  |  |  |  |  |  |  |  |  |  |  |  |  |  |  |  |  |  |  |  |  |  |  |  |  |  |  |  |  |  |  |  |  |  |  |  |  |  |  |  |  |  |  |  |  |  |  |  |  |  |  |  |  |  |  |  |  |  |  |  |  |  |  |  |  |  |  |  |  |  |  |  |  |  |  |  |  |  |  |  |  |  |  |  |  |  |  |  |  |  |  |  |  |  |  |  |  |  |  |  |  |  |  |  |  |  |  |  |  |  |  |  |  |  |  |  |  |  |  |  |  |  |  |  |  |  |  |  |  |  |  |  |  |  |  |  |  |  |  |  |  |  |  |  |  |  |  |  |  |  |  |  |  |  |  |  |  |  |  |  |  |  |  |  |  |  |  |  |  |  |  |  |  |  |  |  |  |  |  |  |  |  |  |  |  |  |  |  |  |  |  |  |  |  |  |  |  |  |  |  |  |  |  |  |  |  |  |  |  |  |  |  |  |  |  |  |  |  |  |  |  |  |  |  |  |  |  |  |  |  |  |  |  |  |  |  |  |  |  |  |  |  |  |  |  |  |  |  |  |  |  |  |  |  |  |  |  |  |  |  |  |  |  |  |  |  |  |  |  |  |  |  |  |  |  |  |  |  |  |  |  |  |  |  |  |  |  |  |  |  |  |  |  |  |  |  |  |  |  |  |  |  |  |  |  |  |  |  |  |  |  |  |  |  |  |  |  |  |  |  |  |  |  |  |  |  |  |  |  |  |  |  |  |  |  |  |  |  |  |  |  |  |  |  |  |  |  |  |  |  |  |  |  |  |  |  |  |  |  |  |  |  |  |  |  |  |  |  |  |  |  |  |  |  |  |  |  |  |  |  |  |  |  |  |  |  |  |  |  |  |  |  |  |  |  |  |  |  |  |  |  |  |  |  |  |  |  |  |  |  |  |  |  |  |  |  |  |  |  |  |  |  |  |  |  |  |  |  |  |  |  |  |  |  |  |  |  |  |  |  |  |  |  |  |  |  |  |  |  |  |  |  |  |  |  |  |  |  |  |  |  |  |  |  |  |  |  |  |  |  |  |  |  |  |  |  |  |  |  |  |  |  |  |  |  |  |  |  |  |  |  |  |  |  |  |  |  |  |  |  |  |  |  |  |  |  |  |  |  |  |  |  |  |  |  |  |  |  |  |  |  |  |  |  |  |  |  |  |  |  |  |  |  |  |  |  |  |  |  |  |  |  |  |  |  |  |  |  |  |  |  |  |  |  |  |  |  |  |  |  |  |  |  |  |  |  |  |  |  |  |  |  |  |  |  |  |  |  |  |  |  |  |  |  |  |  |  |  |  |  |  |  |  |  |  |  |  |  |  |  |  |  |  |  |  |  |  |  |  |  |  |  |  |  |  |  |  |  |  |  |  |  |  |  |  |  |  |  |  |  |  |  |  |  |  |  |  |  |  |  |  |  |  |  |  |  |  |  |  |  |  |  |  |  |  |  |  |  |  |  |  |  |  |  |  |  |  |  |  |  |  |  |  |  |  |  |  |  |  |  |  |  |  |  |  |  |  |  |  |  |  |  |  |  |  |  |  |  |  |  |  |  |  |  |  |  |  |  |  |  |  |  |  |  |  |  |  |  |  |  |  |  |  |  |  |  |  |  |  |  |  |  |  |  |  |  |  |  |  |  |  |  |  |  |  |  |  |  |  |  |  |  |  |  |  |  |  |  |  |  |  |  |  |  |  |  |  |  |  |  |  |  |  |  |  |  |  |  |  |  |  |  |  |  |  |  |  |  |  |  |  |  |  |  |  |  |  |  |  |  |  |  |  |  |  |  |  |  |  |  |  |  |  |  |  |  |  |  |  |  |  |  |  |  |  |  |  |  |  |  |  |  |  |  |  |  |  |  |  |  |  |  |  |  |  |  |  |  |  |  |  |  |  |  |  |  |  |  |  |  |  |  |  |  |  |  |  |  |  |  |  |  |  |  |  |  |  |  |  |  |  |  |  |  |  |  |  |  |  |  |  |  |  |  |  |  |  |  |  |  |  |  |  |  |  |  |  |  |  |  |  |  |  |  |  |  |  |  |  |  |  |  |  |  |  |  |  |  |  |  |
|------|----------------------------------------------------------------------------------------------------|-----|---|--|--|--|--|--|--|--|--|--|--|--|--|--|--|--|--|--|--|--|--|--|--|--|--|--|--|--|--|--|--|--|--|--|--|--|--|--|--|--|--|--|--|--|--|--|--|--|--|--|--|--|--|--|--|--|--|--|--|--|--|--|--|--|--|--|--|--|--|--|--|--|--|--|--|--|--|--|--|--|--|--|--|--|--|--|--|--|--|--|--|--|--|--|--|--|--|--|--|--|--|--|--|--|--|--|--|--|--|--|--|--|--|--|--|--|--|--|--|--|--|--|--|--|--|--|--|--|--|--|--|--|--|--|--|--|--|--|--|--|--|--|--|--|--|--|--|--|--|--|--|--|--|--|--|--|--|--|--|--|--|--|--|--|--|--|--|--|--|--|--|--|--|--|--|--|--|--|--|--|--|--|--|--|--|--|--|--|--|--|--|--|--|--|--|--|--|--|--|--|--|--|--|--|--|--|--|--|--|--|--|--|--|--|--|--|--|--|--|--|--|--|--|--|--|--|--|--|--|--|--|--|--|--|--|--|--|--|--|--|--|--|--|--|--|--|--|--|--|--|--|--|--|--|--|--|--|--|--|--|--|--|--|--|--|--|--|--|--|--|--|--|--|--|--|--|--|--|--|--|--|--|--|--|--|--|--|--|--|--|--|--|--|--|--|--|--|--|--|--|--|--|--|--|--|--|--|--|--|--|--|--|--|--|--|--|--|--|--|--|--|--|--|--|--|--|--|--|--|--|--|--|--|--|--|--|--|--|--|--|--|--|--|--|--|--|--|--|--|--|--|--|--|--|--|--|--|--|--|--|--|--|--|--|--|--|--|--|--|--|--|--|--|--|--|--|--|--|--|--|--|--|--|--|--|--|--|--|--|--|--|--|--|--|--|--|--|--|--|--|--|--|--|--|--|--|--|--|--|--|--|--|--|--|--|--|--|--|--|--|--|--|--|--|--|--|--|--|--|--|--|--|--|--|--|--|--|--|--|--|--|--|--|--|--|--|--|--|--|--|--|--|--|--|--|--|--|--|--|--|--|--|--|--|--|--|--|--|--|--|--|--|--|--|--|--|--|--|--|--|--|--|--|--|--|--|--|--|--|--|--|--|--|--|--|--|--|--|--|--|--|--|--|--|--|--|--|--|--|--|--|--|--|--|--|--|--|--|--|--|--|--|--|--|--|--|--|--|--|--|--|--|--|--|--|--|--|--|--|--|--|--|--|--|--|--|--|--|--|--|--|--|--|--|--|--|--|--|--|--|--|--|--|--|--|--|--|--|--|--|--|--|--|--|--|--|--|--|--|--|--|--|--|--|--|--|--|--|--|--|--|--|--|--|--|--|--|--|--|--|--|--|--|--|--|--|--|--|--|--|--|--|--|--|--|--|--|--|--|--|--|--|--|--|--|--|--|--|--|--|--|--|--|--|--|--|--|--|--|--|--|--|--|--|--|--|--|--|--|--|--|--|--|--|--|--|--|--|--|--|--|--|--|--|--|--|--|--|--|--|--|--|--|--|--|--|--|--|--|--|--|--|--|--|--|--|--|--|--|--|--|--|--|--|--|--|--|--|--|--|--|--|--|--|--|--|--|--|--|--|--|--|--|--|--|--|--|--|--|--|--|--|--|--|--|--|--|--|--|--|--|--|--|--|--|--|--|--|--|--|--|--|--|--|--|--|--|--|--|--|--|--|--|--|--|--|--|--|--|--|--|--|--|--|--|--|--|--|--|--|--|--|--|--|--|--|--|--|--|--|--|--|--|--|--|--|--|--|--|--|--|--|--|--|--|--|--|--|--|--|--|--|--|--|--|--|--|--|--|--|--|--|--|--|--|--|--|--|--|--|--|--|--|--|--|--|--|--|--|--|--|--|--|--|--|--|--|--|--|--|--|--|--|--|--|--|--|--|--|--|--|--|--|--|--|--|--|--|--|--|--|--|--|--|--|--|--|--|--|--|--|--|--|--|--|--|--|--|--|--|--|--|--|--|--|--|--|--|--|--|--|--|--|--|--|--|--|--|--|--|--|--|--|--|--|--|--|--|--|--|--|--|--|--|--|--|--|--|--|--|--|--|--|--|--|--|--|--|--|--|--|--|--|--|--|--|--|--|--|--|--|--|--|--|--|--|--|--|--|--|--|--|--|--|--|--|--|--|--|--|--|--|--|--|--|--|--|--|--|--|--|--|--|--|--|--|--|--|--|--|--|--|--|--|--|--|--|--|--|--|--|--|--|--|--|--|--|--|--|--|--|--|--|--|--|--|--|--|--|--|--|--|--|--|--|--|--|--|--|--|--|--|--|--|--|--|--|--|--|--|--|--|--|--|--|--|--|--|--|--|--|--|--|--|--|--|--|--|--|--|--|--|--|--|--|--|--|--|--|--|--|--|--|--|--|--|--|--|--|--|--|--|--|--|--|--|--|--|--|--|--|--|--|--|--|--|--|--|--|--|--|--|--|--|--|--|--|--|--|--|--|--|--|--|--|--|--|--|--|--|--|--|--|--|--|--|--|--|--|--|--|--|--|--|--|--|--|--|--|--|--|--|--|--|--|--|--|--|--|--|--|--|--|--|--|--|--|--|--|--|--|--|--|--|--|--|--|--|--|--|--|--|--|--|--|--|--|--|--|--|--|--|--|--|--|--|--|--|--|--|--|--|--|--|--|--|--|--|--|--|--|--|--|--|--|--|--|--|--|--|--|--|--|--|--|--|--|--|--|--|--|--|--|--|--|--|--|--|--|--|--|--|--|--|--|--|--|--|--|--|--|--|--|--|--|--|--|--|--|--|--|--|--|--|--|--|--|--|--|--|--|--|--|--|--|--|--|--|--|--|--|--|--|--|--|--|--|--|--|--|--|--|--|--|--|--|--|--|--|--|--|--|--|--|--|--|--|--|--|--|--|--|--|--|--|--|--|--|--|--|--|--|--|--|--|--|--|--|--|--|--|--|--|--|--|--|--|--|--|--|--|--|--|--|--|--|--|--|--|--|--|--|--|--|--|--|--|--|--|--|--|--|--|--|--|--|--|--|--|--|--|

|      |                                                                                         |     |   |   |
|------|-----------------------------------------------------------------------------------------|-----|---|---|
| 13.9 | Rethink the technical architecture and install an extended network of digital solutions | DE3 | x | x |
|------|-----------------------------------------------------------------------------------------|-----|---|---|

Sources:

[BC1] <https://www.bcg.com/de-de/publications/2020/digital-path-to-business-resilience>

[BC2] <https://www.bcg.com/de-de/publications/2020/resilience-more-important-than-efficiency>

[BC3] <https://www.bcg.com/de-de/publications/2017/globalization-strategy-reeves-levin-building-resilient-business-inspired-biology>

[MC1] <https://www.mckinsey.com/business-functions/strategy-and-corporate-finance/our-insights/bubbles-pop-downturns-stop>

[MC2] <https://www.mckinsey.com/business-functions/operations/our-insights/risk-resilience-and-rebalancing-in-global-value-chains>

[DE1] <https://www2.deloitte.com/global/en/pages/risk/articles/covid-19-managing-supply-chain-risk-and-disruption.html>

[DE2] <https://www2.deloitte.com/global/en/pages/about-deloitte/articles/covid-19/covid-19--the-recovery-of-organizations-and-supply-chains.html>

[DE3] <https://www2.deloitte.com/global/en/insights/economy/covid-19/guide-to-organizational-recovery-for-senior-executives-heart-of-resilient-leadership.html>

[DE4] <https://www2.deloitte.com/global/en/insights/economy/covid-19/heart-of-resilient-leadership-responding-to-covid-19.html>

[EY1] [https://www.ey.com/en\\_gl/covid-19/enterprise-resiliency-nine-areas-of-focus-for-covid-19-crisis-management](https://www.ey.com/en_gl/covid-19/enterprise-resiliency-nine-areas-of-focus-for-covid-19-crisis-management)
